# Supplementary material
Source: HighWire-hosted journal article supplement (https://oem.bmj.com/content/76/8/573)
Supplement: inline-supplementary-material-1 [file inline-supplementary-material-1.pdf]

## **SUPPLEMENTARY FILES**

**Supplementary Table 1.** ICD-9 diagnoses used to identify low back pain-related claims in the WorkSafeBC claim file

| ICD-9 Codes <sup>1</sup> | ICD-9 Diagnosis                                                                      |
|--------------------------|--------------------------------------------------------------------------------------|
| 722.1                    | Displacement of thoracic or lumbar intervertebral disc without myelopathy            |
| 722.2                    | Displacement of intervertebral disc, site unspecified, without myelopathy            |
| 722.3                    | Schmorl's nodes                                                                      |
| 722.5                    | Degeneration of thoracic or lumbar intervertebral disc                               |
| 722.6                    | Degeneration of intervertebral disc, site unspecified                                |
| 722.9                    | Other and unspecified disc disorder                                                  |
| 724.0                    | Spinal stenosis other than cervical                                                  |
| 724.2                    | Lumbago                                                                              |
| 724.3                    | Sciatica                                                                             |
| 724.4                    | Thoracic or lumbosacral neuritis or radiculitis, unspecified                         |
| 724.5                    | Backache, unspecified                                                                |
| 724.6                    | Disorders of sacrum                                                                  |
| 724.7                    | Disorders of coccyx                                                                  |
| 724.8                    | Other symptoms referable to back                                                     |
| 724.9                    | Other unspecified back disorders                                                     |
| 846.0                    | Sprains and strains of sacroiliac region, Lumbosacral (joint) (ligament)             |
| 846.1                    | Sprains and strains of sacroiliac region, Sacroiliac ligament                        |
| 846.2                    | Sprains and strains of sacroiliac region, Sacrospinatus (ligament)                   |
| 846.3                    | Sprains and strains of sacroiliac region, Sacrotuberous (ligament)                   |
| 846.8                    | Sprains and strains of sacroiliac region, Other specified sites of sacroiliac region |
| 846.9                    | Sprains and strains of sacroiliac region, Unspecified site of sacroiliac region      |
| 847.2                    | Sprains and strains of other and unspecified parts of back, Lumbar                   |
| 847.3                    | Sprains and strains of other and unspecified parts of back, Sacrum                   |
| 847.4                    | Sprains and strains of other and unspecified parts of back, Coccyx                   |
| 847.9                    | Sprains and strains of other and unspecified parts of back, Unspecified              |

**Abbreviations:** ICD-9=International Classification of Diseases, 9<sup>th</sup> Revision

<sup>1</sup>ICD-9 diagnoses are coded to 4 digits in the WorkSafeBC claim file.

**Supplementary Table 2.** ICD-9 and ICD-10-CA diagnoses used to exclude claimants with low back pain-related hospitalizations or serious low back pain-related outpatient health care visits and/or hospitalizations within 5 days of injury date

| ICD-9               |                                                                            | ICD-10-CA           |                                                                                                                                                                                                            |
|---------------------|----------------------------------------------------------------------------|---------------------|------------------------------------------------------------------------------------------------------------------------------------------------------------------------------------------------------------|
| Code <sup>1,2</sup> | ICD-9 Diagnosis                                                            | Code <sup>1,2</sup> | ICD-10-CA Diagnosis                                                                                                                                                                                        |
| 170                 | Malignant neoplasm of bone and articular cartilage                         | C40<br>C41          | Malignant neoplasm of bone and articular cartilage of limbs<br>Malignant neoplasm of bone and articular cartilage of other and unspecified sites                                                           |
| 171                 | Malignant neoplasm of connective and other soft tissue                     | C49                 | Malignant neoplasm of other connective and soft tissue                                                                                                                                                     |
| 192                 | Malignant neoplasm of other and unspecified parts of nervous system        | C70<br>C72          | Malignant neoplasm of meninges<br>Malignant neoplasm of spinal cord, cranial nerves, and other parts of central nervous system                                                                             |
| 195                 | Malignant neoplasm of other and ill-defined sites                          | C76                 | Malignant neoplasm of other and ill-defined sites                                                                                                                                                          |
| 198                 | Secondary malignant neoplasm of other specified sites                      | C79                 | Secondary malignant neoplasm of other and unspecified sites                                                                                                                                                |
| 213                 | Benign neoplasm of bone and articular cartilage                            | D16                 | Benign neoplasm of bone and articular cartilage                                                                                                                                                            |
| 215                 | Other benign neoplasm of connective and other soft tissue                  | D21                 | Other benign neoplasms of connective and other soft tissue                                                                                                                                                 |
| 225                 | Benign neoplasm of brain and other parts of nervous system                 | D32<br>D33          | Benign neoplasm of meninges<br>Benign neoplasm of brain and other parts of central nervous system                                                                                                          |
| 237                 | Neoplasm of uncertain behavior of endocrine glands and nervous system      | D42<br>D43<br>D44   | Neoplasm of uncertain or unknown behaviour of meninges<br>Neoplasm of uncertain or unknown behaviour of brain and central nervous system<br>Neoplasm of uncertain or unknown behaviour of endocrine glands |
| 238                 | Neoplasm of uncertain behaviour of other and unspecified sites and tissues | D45<br>D47          | Polycythaemia vera<br>Other neoplasms of uncertain or unknown behaviour of lymphoid, haematopoietic and related tissue                                                                                     |

| ICD-9<br>Code <sup>1,2</sup> | ICD-9 Diagnosis                                               | ICD-10-<br>CA<br>Code <sup>1,2</sup> | ICD-10-CA Diagnosis                                                       |
|------------------------------|---------------------------------------------------------------|--------------------------------------|---------------------------------------------------------------------------|
|                              |                                                               | D48                                  | Neoplasm of uncertain or unknown behaviour of other and unspecified sites |
| 239                          | Neoplasms of unspecified nature                               | D48                                  | Neoplasm of uncertain or unknown behaviour of other and unspecified sites |
| 344                          | Other paralytic syndromes                                     | G83                                  | Other paralytic syndromes                                                 |
| 353                          | Nerve root and plexus disorders                               | G54                                  | Nerve root and plexus disorders                                           |
| 720                          | Ankylosing spondylitis and other inflammatory spondylopathies | M45                                  | Ankylosing spondylitis                                                    |
|                              |                                                               | M46                                  | Other inflammatory spondylopathies                                        |
| 721                          | Spondylosis and allied disorders                              | M47                                  | Spondylosis                                                               |
|                              |                                                               | M48                                  | Other spondylopathies                                                     |
| 722 <sup>3</sup>             | Intervertebral disc disorders                                 | M50                                  | Cervical disc disorders                                                   |
|                              |                                                               | M51                                  | Other intervertebral disc disorders                                       |
|                              |                                                               | M96                                  | Postprocedural musculoskeletal disorders, not elsewhere classified        |
| 724 <sup>3</sup>             | Other and unspecified disorders of back                       | M43                                  | Other deforming dorsopathies                                              |
|                              |                                                               | M46                                  | Other inflammatory spondylopathies                                        |
|                              |                                                               | M48                                  | Other spondylopathies                                                     |
|                              |                                                               | M53                                  | Other dorsopathies, not elsewhere classified                              |
|                              |                                                               | M54                                  | Dorsalgia                                                                 |
| 733                          | Other disorders of bone and cartilage                         | M80                                  | Osteoporosis with pathological fracture                                   |
|                              |                                                               | M81                                  | Osteoporosis without pathological fracture                                |
|                              |                                                               | M84                                  | Disorders of continuity of bone                                           |
|                              |                                                               | M85                                  | Other disorders of bone density and structure                             |
|                              |                                                               | M87                                  | Osteonecrosis                                                             |
|                              |                                                               | M89                                  | Other disorders of bone                                                   |
|                              |                                                               | M94                                  | Other disorders of cartilage                                              |

| ICD-9<br>Code <sup>1,2</sup> | ICD-9 Diagnosis                                                    | ICD-10-<br>CA<br>Code <sup>1,2</sup> | ICD-10-CA Diagnosis                                                               |
|------------------------------|--------------------------------------------------------------------|--------------------------------------|-----------------------------------------------------------------------------------|
| 738                          | Other acquired deformity                                           | M95                                  | Other acquired deformities of musculoskeletal system and connective tissue        |
| 805                          | Fracture of vertebral column without mention of spinal cord injury | S12                                  | Fracture of neck                                                                  |
|                              |                                                                    | S22                                  | Fracture of rib(s), sternum and thoracic spine                                    |
|                              |                                                                    | S32                                  | Fracture of lumbar spine and pelvis                                               |
| 806                          | Fracture of vertebral column with spinal cord injury               | S12                                  | Fracture of neck                                                                  |
|                              |                                                                    | S14                                  | Injury of nerves and spinal cord at neck level                                    |
|                              |                                                                    | S22                                  | Fracture of rib(s), sternum and thoracic spine                                    |
|                              |                                                                    | S24                                  | Injury of nerves and spinal cord at thorax level                                  |
|                              |                                                                    | S32                                  | Fracture of lumbar spine and pelvis                                               |
|                              |                                                                    | S34                                  | Injury of nerves and spinal cord at abdomen, lower back, and pelvis level         |
| 839                          | Other, multiple, and ill-defined dislocations                      | S13                                  | Dislocation, sprain and strain of joints and ligaments at neck level              |
|                              |                                                                    | S23                                  | Dislocation, sprain and strain of joints and ligaments of thorax                  |
|                              |                                                                    | S33                                  | Dislocation, sprain and strain of joints and ligaments of lumbar spine and pelvis |
|                              |                                                                    | S43                                  | Dislocation, sprain and strain of joints and ligaments of shoulder girdle         |
| 846 <sup>3</sup>             | Sprains and strains of sacroiliac region                           | S33                                  | Dislocation, sprain and strain of joints and ligaments of lumbar spine and pelvis |
| 847 <sup>3</sup>             | Sprains and strains of other and unspecified parts of back         | S13                                  | Dislocation, sprain and strain of joints and ligaments at neck level              |
|                              |                                                                    | S16                                  | Injury of muscle and tendon at neck level                                         |
|                              |                                                                    | S23                                  | Dislocation, sprain and strain of joints and ligaments of thorax                  |
|                              |                                                                    | S39                                  | Other and unspecified injuries of abdomen, lower back and pelvis                  |

| ICD-9               |                                                           | ICD-10-CA           |                                                                                    |
|---------------------|-----------------------------------------------------------|---------------------|------------------------------------------------------------------------------------|
| Code <sup>1,2</sup> | ICD-9 Diagnosis                                           | Code <sup>1,2</sup> | ICD-10-CA Diagnosis                                                                |
| 876                 | Open wound of back                                        | S21                 | Open wound of thorax                                                               |
|                     |                                                           | S31                 | Open wound of abdomen, lower back and pelvis                                       |
| 877                 | Open wound of buttock                                     | S31                 | Open wound of abdomen, lower back and pelvis                                       |
| 926                 | Crushing injury of trunk                                  | S38                 | Crushing injury and traumatic amputation of part of abdomen, lower back and pelvis |
|                     |                                                           | S28                 | Crushing injury of thorax and traumatic amputation of part of thorax               |
|                     |                                                           | T21                 | Burn and corrosion of trunk                                                        |
| 952                 | Spinal cord injury without evidence of spinal bone injury | S14                 | Injury of nerves and spinal cord at neck level                                     |
|                     |                                                           | S24                 | Injury of nerves and spinal cord at thorax level                                   |
|                     |                                                           | S34                 | Injury of nerves and spinal cord at abdomen, lower back, pelvis level              |
| 953                 | Injury to nerve roots and spinal plexus                   | S14                 | Injury of nerves and spinal cord at neck level                                     |
|                     |                                                           | S24                 | Injury of nerves and spinal cord at thorax level                                   |
|                     |                                                           | S34                 | Injury of nerves and spinal cord at abdomen, lower back, and pelvis level          |

**Abbreviations:** ICD-9=International Classification of Diseases, 9<sup>th</sup> Revision; ICD-10-CA=International Classification of Diseases, 10<sup>th</sup> Revision, Canada; LBP=low back pain

<sup>1</sup>Codes are used to identify and exclude claimants with low back pain-related hospitalizations or serious low back pain-related outpatient healthcare visits within five days of injury date in the Medical Services Plan (MSP) and Discharge Abstract Database (DAD). ICD-9 codes in MSP data are only considered valid to 3 digits. To maintain consistency with the codes used in the MSP file, only 3-digit ICD-10-CA codes are also used.

<sup>2</sup>Both ICD-9 and ICD-10-CA codes are available in the DAD. Corresponding ICD-10-CA codes have been mapped to the appropriate ICD-9 codes. The Canadian Institute for Health Information provided backward conversions for ICD-10-CA to ICD-9 codes from 2001/2002 to 2007/2008 and these conversions were used to help guide the mapping.

<sup>3</sup>Only applies to hospitalizations.

**Supplementary Table 3.** ICD-9 and ICD-10-CA diagnoses used to identify comorbid health conditions in the two years before injury date

| Comorbidity                                                                               | Reference(s) | ICD-9 <sup>1,2</sup> | ICD-9 Code Description                                        | ICD-10-CA <sup>1,2</sup>                        | ICD-10 Code Description                                                              |                                   |
|-------------------------------------------------------------------------------------------|--------------|----------------------|---------------------------------------------------------------|-------------------------------------------------|--------------------------------------------------------------------------------------|-----------------------------------|
| Arthritis /<br>Rheumatism<br>and Other Joint<br>Disorders<br>(Excluding Neck<br>and Back) | 1            | 274                  | Gout                                                          | M00                                             | Pyogenic arthritis                                                                   |                                   |
|                                                                                           |              | 446                  | Polyarteritis nodosa and allied conditions                    | M01                                             | Direct infections of joint in infectious and parasitic diseases classified elsewhere |                                   |
|                                                                                           |              | 710                  | Diffuse diseases of connective tissue                         | M02                                             | Reactive arthropathies                                                               |                                   |
|                                                                                           |              | 711                  | Arthropathy associated with infections                        | M03                                             | Postinfective and reactive arthropathies in diseases classified elsewhere            |                                   |
|                                                                                           |              | 712                  | Crystal arthropathies                                         | M05                                             | Seropositive rheumatoid arthritis                                                    |                                   |
|                                                                                           |              | 713                  | Arthropathy associated with other disorders                   | M06                                             | Other rheumatoid arthritis                                                           |                                   |
|                                                                                           |              | 714                  | Rheumatoid arthritis and other inflammatory polyarthropathies | M07                                             | Psoriatic and enteropathic arthropathies                                             |                                   |
|                                                                                           |              | 715                  | Osteoarthritis and allied disorders                           | M10                                             | Gout                                                                                 |                                   |
|                                                                                           |              | 716                  | Other and unspecified arthropathies                           | M11                                             | Other crystal arthropathies                                                          |                                   |
|                                                                                           |              | 717                  | Internal derangement of knee                                  | M12                                             | Other specific arthropathies                                                         |                                   |
|                                                                                           |              | 718                  | Other derangement of joint                                    | M13                                             | Other arthritis                                                                      |                                   |
|                                                                                           |              | 719                  | Other and unspecified disorders of joint                      | M14                                             | Arthropathies in other diseases classified elsewhere                                 |                                   |
|                                                                                           |              | 725                  | Polymyalgia rheumatic                                         | M15                                             | Polyarthrosis                                                                        |                                   |
|                                                                                           |              | 726                  | Peripheral enthesopathies and allied syndromes                | M16                                             | Coxarthrosis                                                                         |                                   |
|                                                                                           |              | 727                  | Other disorders of synovium, tendon, and bursa                | M17                                             | Gonarthrosis                                                                         |                                   |
|                                                                                           |              | 728                  | Disorders of muscle, ligament, and fascia                     | M18                                             | Arthrosis of first carpometacarpal joint                                             |                                   |
|                                                                                           |              | 729                  | Other disorders of soft tissues                               | M19                                             | Other arthrosis                                                                      |                                   |
|                                                                                           |              |                      |                                                               |                                                 | M22                                                                                  | Disorders of patella              |
|                                                                                           |              |                      |                                                               |                                                 | M23                                                                                  | Internal derangement of knee      |
|                                                                                           |              |                      |                                                               |                                                 | M24                                                                                  | Other specific joint derangements |
|                                                                                           |              |                      | M25                                                           | Other joint disorders, not elsewhere classified |                                                                                      |                                   |

| Comorbidity | Reference(s) | ICD-9 <sup>1,2</sup> | ICD-9 Code Description | ICD-10-CA <sup>1,2</sup> | ICD-10 Code Description                                                  |
|-------------|--------------|----------------------|------------------------|--------------------------|--------------------------------------------------------------------------|
|             |              |                      |                        | M30                      | Polyarteritis nodosa and related conditions                              |
|             |              |                      |                        | M31                      | Other necrotizing vasculopathies                                         |
|             |              |                      |                        | M32                      | Systemic lupus erythematosus                                             |
|             |              |                      |                        | M33                      | Dermatopolymyositis                                                      |
|             |              |                      |                        | M34                      | Systemic sclerosis                                                       |
|             |              |                      |                        | M35                      | Other systemic involvement of connective tissue                          |
|             |              |                      |                        | M36                      | Systemic disorders of connective tissue in diseases classified elsewhere |
|             |              |                      |                        | M60                      | Myositis                                                                 |
|             |              |                      |                        | M61                      | Calcification and ossification of muscle                                 |
|             |              |                      |                        | M62                      | Other disorders of muscle                                                |
|             |              |                      |                        | M63                      | Disorders of muscle in diseases classified elsewhere                     |
|             |              |                      |                        | M65                      | Synovitis and tenosynovitis                                              |
|             |              |                      |                        | M66                      | Spontaneous rupture of synovium and tendon                               |
|             |              |                      |                        | M67                      | Other disorders of synovium and tendon                                   |
|             |              |                      |                        | M68                      | Disorders of synovium and tendon in diseases classified elsewhere        |
|             |              |                      |                        | M70                      | Soft tissue disorders related to use, overuse and pressure               |
|             |              |                      |                        | M71                      | Other bursopathies                                                       |
|             |              |                      |                        | M72                      | Fibroblastic disorders                                                   |
|             |              |                      |                        | M73                      | Soft tissue disorders in diseases classified elsewhere                   |
|             |              |                      |                        | M75                      | Shoulder lesions                                                         |
|             |              |                      |                        | M76                      | Enthesopathies of lower limb, excluding foot                             |
|             |              |                      |                        | M77                      | Other enthesopathies                                                     |
|             |              |                      |                        | M79                      | Other soft tissue disorders, not elsewhere classified                    |



| Comorbidity        | Reference(s) | ICD-9 <sup>1,2</sup> | ICD-9 Code Description                                        | ICD-10-CA <sup>1,2</sup>   | ICD-10 Code Description                          |
|--------------------|--------------|----------------------|---------------------------------------------------------------|----------------------------|--------------------------------------------------|
| Back and Neck Pain | 2-4          | 720                  | Ankylosing spondylitis and other inflammatory spondylopathies | M40                        | Kyphosis and lordosis                            |
|                    |              | 721                  | Spondylosis and allied disorders                              | M41                        | Scoliosis                                        |
|                    |              | 722                  | Intervertebral disc disorders                                 | M43                        | Other deforming dorsopathies                     |
|                    |              | 723                  | Other disorders of cervical region                            | M45                        | Ankylosing spondylitis                           |
|                    |              | 724                  | Other and unspecified disorders of back                       | M46                        | Other inflammatory spondylopathies               |
|                    |              | 737                  | Curvature of spine                                            | M47                        | Spondylosis                                      |
|                    |              | 738.2                | Acquired deformity of neck                                    | M48                        | Other spondylopathies                            |
|                    |              | 738.4                | Acquired spondylolisthesis                                    |                            |                                                  |
|                    |              | 738.5                | Other acquired deformity of back or spine                     |                            |                                                  |
|                    |              | 739.1                | Cervical region                                               | M49                        | Spondylopathies in diseases classified elsewhere |
|                    |              | 739.2                | Thoracic region                                               |                            |                                                  |
|                    |              | 739.3                | Lumbar region                                                 |                            |                                                  |
|                    |              | 739.4                | Sacral region                                                 |                            |                                                  |
|                    |              | 805                  | Fracture of vertebral column without mention of spinal cord   | M50                        | Cervical disc disorders                          |
|                    |              | 839.0                | Cervical vertebra, closed dislocation                         | M51                        | Other intervertebral disc disorders              |
|                    |              | 839.1                | Cervical vertebra, open dislocation                           |                            |                                                  |
|                    |              | 839.2                | Thoracic and lumbar vertebra, closed dislocation              |                            |                                                  |
|                    |              | 839.3                | Thoracic and lumbar vertebra, open dislocation                |                            |                                                  |
|                    |              | 839.4                | Other vertebra, closed dislocation                            |                            |                                                  |
|                    |              | 839.5                | Other vertebra, open dislocation                              |                            |                                                  |
|                    |              | 846                  | Sprains and strains of sacroiliac region                      | M53                        | Other dorsopathies, not elsewhere classified     |
|                    |              | 847                  | Sprains and strains of other and unspecified parts of back    | M54                        | Dorsalgia                                        |
|                    |              |                      | M95.3                                                         | Acquired deformity of neck |                                                  |

| Comorbidity      | Reference(s) | ICD-9 <sup>1,2</sup> | ICD-9 Code Description                                                           | ICD-10-CA <sup>1,2</sup> | ICD-10 Code Description                                                           |
|------------------|--------------|----------------------|----------------------------------------------------------------------------------|--------------------------|-----------------------------------------------------------------------------------|
|                  |              | 905.1                | Late effect of fracture of spine and trunk without mention of spinal cord lesion | M96                      | Postprocedural musculoskeletal disorders, not elsewhere classified                |
|                  |              |                      |                                                                                  | M99                      | Biomechanical lesions, not elsewhere classified                                   |
|                  |              |                      |                                                                                  | S12                      | Fracture of neck                                                                  |
|                  |              |                      |                                                                                  | S13                      | Dislocation, sprain and strain of joints and ligaments at neck level              |
|                  |              |                      |                                                                                  | S16                      | Injury of muscle and tendon at neck level                                         |
|                  |              |                      |                                                                                  | S22.0                    | Fracture of thoracic vertebra                                                     |
|                  |              |                      |                                                                                  | S22.1                    | Multiple fractures of thoracic spine                                              |
|                  |              |                      |                                                                                  | S23                      | Dislocation, sprain and strain of joints and ligaments of lumbar spine and pelvis |
|                  |              |                      |                                                                                  | S32.0                    | Fracture of lumbar vertebra                                                       |
|                  |              |                      |                                                                                  | S32.1                    | Fracture of sacrum                                                                |
|                  |              |                      |                                                                                  | S32.3                    | Fracture of coccyx                                                                |
|                  |              |                      |                                                                                  | S33                      | Dislocation, sprain and strain of joints and ligaments of lumbar spine and pelvis |
|                  |              |                      |                                                                                  | S39                      | Other and unspecified injuries of abdomen, lower back, and pelvis                 |
|                  |              |                      |                                                                                  | T91.1                    | Sequelae of fracture of spine                                                     |
| Neuropathic Pain | <sup>3</sup> | 053.1                | Herpes zoster with other nervous system complications                            | B02.2                    | Zoster with other nervous system complications                                    |
|                  |              | 250.6                | Diabetes with neurological manifestations                                        | E10.4                    | Type 1 diabetes mellitus with neurological complications                          |
|                  |              | 337.2                | Reflex sympathetic dystrophy                                                     | E11.4                    | Type 2 diabetes mellitus with neurological complications                          |
|                  |              | 350                  | Trigeminal nerve disorders                                                       | E12.4                    | Malnutrition-related diabetes mellitus with neurological complications            |
|                  |              | 352.1                | Glossopharyngeal neuralgia                                                       | E13.4                    | Other specified diabetes mellitus with neurological complications                 |

| Comorbidity                     | Reference(s) | ICD-9 <sup>1,2</sup> | ICD-9 Code Description                                | ICD-10-CA <sup>1,2</sup> | ICD-10 Code Description                                            |
|---------------------------------|--------------|----------------------|-------------------------------------------------------|--------------------------|--------------------------------------------------------------------|
|                                 |              | 353                  | Nerve root and plexus disorders                       | E14.4                    | Unspecified diabetes mellitus with neurological complications      |
|                                 |              | 354                  | Mononeuritis of upper limb and mononeuritis multiplex | G50                      | Disorders of trigeminal nerve                                      |
|                                 |              | 355                  | Mononeuritis of lower limb                            | G52.1                    | Disorders of glossopharyngeal nerve                                |
|                                 |              | 357                  | Inflammatory and toxic neuropathy                     | G53.0                    | Postzoster neuralgia                                               |
|                                 |              | 733.7                | Algoneurodystrophy                                    | G54                      | Nerve root and plexus disorders                                    |
|                                 |              |                      |                                                       | G55                      | Nerve root and plexus compressions classified elsewhere            |
|                                 |              |                      |                                                       | G56                      | Mononeuropathies of upper limb                                     |
|                                 |              |                      |                                                       | G57                      | Mononeuropathies of lower limb                                     |
|                                 |              |                      |                                                       | G58                      | Other mononeuropathies                                             |
|                                 |              |                      |                                                       | G59                      | Mononeuropathy in diseases classified elsewhere                    |
|                                 |              |                      |                                                       | G61                      | Inflammatory polyneuropathy                                        |
|                                 |              |                      |                                                       | G62                      | Other polyneuropathies                                             |
|                                 |              |                      |                                                       | G63                      | Polyneuropathy in diseases classified elsewhere                    |
|                                 |              |                      |                                                       | G90                      | Disorders of autonomic nervous system                              |
|                                 |              |                      |                                                       | G99                      | Other disorders of nervous system in diseases classified elsewhere |
|                                 |              |                      |                                                       | M89.0                    | Algoneurodystrophy                                                 |
| Migraine and Headache Disorders | 5, 6         | 307.8                | Tension headache                                      | G43                      | Migraine                                                           |
|                                 |              | 339                  | Other headache syndromes (*introduced in 2008)        | G44                      | Other headache syndromes                                           |
|                                 |              | 346                  | Migraine                                              | R51                      | Headache                                                           |
|                                 |              | 784.0                | Headache                                              |                          |                                                                    |
| Mood and Anxiety Disorders      | 7-9          | 296                  | Episodic mood disorders                               | F30                      | Manic episode                                                      |
|                                 |              | 300                  | Anxiety, dissociative, and somatoform disorders       | F31                      | Bipolar affective disorder                                         |
|                                 |              | 308                  | Acute reaction to stress                              | F32                      | Depressive disorder                                                |

| Comorbidity                              | Reference(s) | ICD-9 <sup>1,2</sup> | ICD-9 Code Description                                                          | ICD-10-CA <sup>1,2</sup>                          | ICD-10 Code Description                                                                                                                                                                                                                                                  |
|------------------------------------------|--------------|----------------------|---------------------------------------------------------------------------------|---------------------------------------------------|--------------------------------------------------------------------------------------------------------------------------------------------------------------------------------------------------------------------------------------------------------------------------|
|                                          |              | 309                  | Adjustment reaction                                                             | F33                                               | Recurrent depressive disorder                                                                                                                                                                                                                                            |
|                                          |              | 311                  | Depressive disorder, not elsewhere classified                                   | F34                                               | Persistent mood (affective) disorders                                                                                                                                                                                                                                    |
|                                          |              | 50B                  | Depression/anxiety (*only for MSP)                                              | F38<br>F39<br>F40<br>F41<br>F42<br>F43<br><br>F99 | Other mood (affective) disorders<br>Unspecified mood (affective) disorder<br>Phobic anxiety disorders<br>Other anxiety disorders<br>Obsessive-compulsive disorder<br>Reaction to severe stress, and adjustment disorders<br><br>Mental disorder, not otherwise specified |
| Intentional Self-Harm or Suicide Attempt | 9-12         | E950                 | Suicide and self-inflicted poisoning by solid or liquid substances              | X60                                               | Intentional self-poisoning by and exposure to nonopioid analgesics, antipyretics and antirheumatics                                                                                                                                                                      |
|                                          |              | E951                 | Suicide and self-inflicted poisoning by gases in domestic use                   | X61                                               | Intentional self-poisoning by and exposure to antiepileptic, sedative-hypnotic, antiparkinsonism and psychotropic drugs, not elsewhere classified                                                                                                                        |
|                                          |              | E952                 | Suicide and self-inflicted poisoning by other gases and vapors                  | X62                                               | Intentional self-poisoning by and exposure to narcotics and psychodysleptics [hallucinogens], not elsewhere classified                                                                                                                                                   |
|                                          |              | E953                 | Suicide and self-inflicted poisoning by hanging, strangulation, and suffocation | X63                                               | Intentional self-poisoning by and exposure to other drugs acting on the autonomic nervous system                                                                                                                                                                         |
|                                          |              | E954                 | Suicide and self-inflicted poisoning by submersion [drowning]                   | X64                                               | Intentional self-poisoning by and exposure to other and unspecified drugs, medicaments and biological substances                                                                                                                                                         |
|                                          |              | E955                 | Suicide and self-inflicted poisoning by firearms, air guns and explosives       | X65                                               | Intentional self-poisoning by and exposure to alcohol                                                                                                                                                                                                                    |
|                                          |              | E956                 | Suicide and self-inflicted poisoning by cutting and piercing instrument         | X66                                               | Intentional self-poisoning by and exposure to organic solvents and halogenated hydrocarbons and their vapours                                                                                                                                                            |

| Comorbidity | Reference(s) | ICD-9 <sup>1,2</sup> | ICD-9 Code Description                                                                                | ICD-10-CA <sup>1,2</sup> | ICD-10 Code Description                                                                              |
|-------------|--------------|----------------------|-------------------------------------------------------------------------------------------------------|--------------------------|------------------------------------------------------------------------------------------------------|
|             |              | E957                 | Suicide and self-inflicted poisoning by jumping from high place                                       | X67                      | Intentional self-poisoning by and exposure to other gases and vapours                                |
|             |              | E958                 | Suicide and self-inflicted poisoning by other and unspecified means                                   | X68                      | Intentional self-poisoning by and exposure to pesticides                                             |
|             |              | E959                 | Late effects of self-inflicted injury                                                                 | X69                      | Intentional self-poisoning by and exposure to other and unspecified chemicals and noxious substances |
|             |              | E980                 | Poisoning by solid or liquid substances, undetermined whether accidentally or purposely inflicted     | X70                      | Intentional self-harm by hanging, strangulation and suffocation                                      |
|             |              | E981                 | Poisoning by gases in domestic use, undetermined whether accidentally or purposely inflicted          | X71                      | Intentional self-harm by drowning and submersion                                                     |
|             |              | E982                 | Poisoning by other gases, undetermined whether accidentally or purposely inflicted                    | X72                      | Intentional self-harm by handgun discharge                                                           |
|             |              | E983                 | Hanging, strangulation, or suffocation, undetermined whether accidentally or purposely inflicted      | X73                      | Intentional self-harm by rifle, shotgun and larger firearm discharge                                 |
|             |              | E984                 | Submersion [drowning], undetermined whether accidentally or purposely inflicted                       | X74                      | Intentional self-harm by other and unspecified firearm discharge                                     |
|             |              | E985                 | Injury by firearms, air guns and explosives, undetermined whether accidentally or purposely inflicted | X75                      | Intentional self-harm by explosive material                                                          |
|             |              | E986                 | Injury by cutting and piercing instruments, undetermined whether accidentally or purposely inflicted  | X76                      | Intentional self-harm by smoke, fire and flames                                                      |
|             |              | E987                 | Falling from high place, undetermined whether accidentally or purposely inflicted                     | X77                      | Intentional self-harm by steam, hot vapours and hot objects                                          |

| Comorbidity | Reference(s) | ICD-9 <sup>1,2</sup> | ICD-9 Code Description                                                                          | ICD-10-CA <sup>1,2</sup> | ICD-10 Code Description                                                                                                     |
|-------------|--------------|----------------------|-------------------------------------------------------------------------------------------------|--------------------------|-----------------------------------------------------------------------------------------------------------------------------|
|             |              | E988                 | Injury by other and unspecified means, undetermined whether accidentally or purposely inflicted | X78                      | Intentional self-harm by sharp object                                                                                       |
|             |              | E989                 | Late effects of injury, undetermined whether accidentally or purposely inflicted                | X79                      | Intentional self-harm by blunt object                                                                                       |
|             |              |                      |                                                                                                 | X80                      | Intentional self-harm by jumping from a high place                                                                          |
|             |              |                      |                                                                                                 | X81                      | Intentional self-harm by jumping or lying before moving object                                                              |
|             |              |                      |                                                                                                 | X82                      | Intentional self-harm by crashing of motor vehicle                                                                          |
|             |              |                      |                                                                                                 | X83                      | Intentional self-harm by other specified means                                                                              |
|             |              |                      |                                                                                                 | X84                      | Intentional self-harm by unspecified means                                                                                  |
|             |              |                      |                                                                                                 | Y87                      | Sequelae of intentional self-harm, assault and events of undetermined intent                                                |
|             |              |                      |                                                                                                 | Y10                      | Poisoning by and exposure to nonopioid analgesics, antipyretics and antirheumatics, undetermined intent                     |
|             |              |                      |                                                                                                 | Y11                      | Poisoning by and exposure to antiepileptic, sedative-hypnotic, antiparkinsonism and psychotropic drugs, undetermined intent |
|             |              |                      |                                                                                                 | Y12                      | Poisoning by and exposure to narcotics and psychodysleptics [hallucinogens], not elsewhere classified, undetermined intent  |
|             |              |                      |                                                                                                 | Y13                      | Poisoning by and exposure to other drugs acting on the autonomic nervous system, undetermined intent                        |
|             |              |                      |                                                                                                 | Y14                      | Poisoning by and exposure to other and unspecified drugs, medicaments and                                                   |

| Comorbidity | Reference(s) | ICD-9 <sup>1,2</sup> | ICD-9 Code Description | ICD-10-CA <sup>1,2</sup> | ICD-10 Code Description                                                                                           |
|-------------|--------------|----------------------|------------------------|--------------------------|-------------------------------------------------------------------------------------------------------------------|
|             |              |                      |                        |                          | biological substances, undetermined intent                                                                        |
|             |              |                      |                        | Y15                      | Poisoning by and exposure to alcohol, undetermined intent                                                         |
|             |              |                      |                        | Y16                      | Poisoning by and exposure to organic solvents and halogenated hydrocarbons and their vapours, undetermined intent |
|             |              |                      |                        | Y17                      | Poisoning by and exposure to other gases and vapours, undetermined intent                                         |
|             |              |                      |                        | Y18                      | Poisoning by and exposure to pesticides, undetermined intent                                                      |
|             |              |                      |                        | Y19                      | Poisoning by and exposure to other and unspecified chemicals and noxious substances, undetermined intent          |
|             |              |                      |                        | Y20                      | Hanging strangulation and suffocation, undetermined intent                                                        |
|             |              |                      |                        | Y21                      | Drowning and submersion, undetermined intent                                                                      |
|             |              |                      |                        | Y22                      | Handgun discharge, undetermined intent                                                                            |
|             |              |                      |                        | Y23                      | Rifle, shotgun and larger firearm discharge, undetermined intent                                                  |
|             |              |                      |                        | Y24                      | Other and unspecified firearm discharge, undetermined intent                                                      |
|             |              |                      |                        | Y25                      | Contact with explosive material, undetermined intent                                                              |
|             |              |                      |                        | Y26                      | Exposure to smoke, fire and flames, undetermined intent                                                           |
|             |              |                      |                        | Y27                      | Contact with steam, hot vapours and hot objects, undetermined intent                                              |
|             |              |                      |                        | Y28                      | Contact with sharp object, undetermined intent                                                                    |

| Comorbidity             | Reference(s) | ICD-9 <sup>1,2</sup> | ICD-9 Code Description           | ICD-10-CA <sup>1,2</sup> | ICD-10 Code Description                                                             |
|-------------------------|--------------|----------------------|----------------------------------|--------------------------|-------------------------------------------------------------------------------------|
|                         |              |                      |                                  | Y29                      | Contact with blunt object, undetermined intent                                      |
|                         |              |                      |                                  | Y30                      | Falling, jumping or pushed from a high place, undetermined intent                   |
|                         |              |                      |                                  | Y31                      | Falling, lying or running before or into moving object, undetermined intent         |
|                         |              |                      |                                  | Y32                      | Crashing of motor vehicle, undetermined intent                                      |
|                         |              |                      |                                  | Y33                      | Other specified means, undetermined intent                                          |
|                         |              |                      |                                  | Y34                      | Unspecified event, undetermined intent                                              |
|                         |              |                      |                                  | Y87                      | Sequelae of intentional self-harm, assault and events of undetermined intent        |
| Substance Use Disorders | 8, 13        | 291                  | Alcohol-induced mental disorders | F10                      | Mental and behavioural disorders due to use of alcohol                              |
|                         |              | 292                  | Drug-induced mental disorders    | F11                      | Mental and behavioural disorders due to use of opioids                              |
|                         |              | 303                  | Alcohol dependence syndrome      | F12                      | Mental and behavioural disorders due to use of cannabinoids                         |
|                         |              | 304                  | Drug dependence                  | F13                      | Mental and behavioural disorders due to use of sedatives or hypnotics               |
|                         |              | 305                  | Nondependent abuse of drugs      | F14                      | Mental and behavioural disorders due to use of cocaine                              |
|                         |              |                      |                                  | F15                      | Mental and behavioural disorders due to use of other stimulants, including caffeine |
|                         |              |                      |                                  | F16                      | Mental and behavioural disorders due to use of hallucinogens                        |
|                         |              |                      |                                  | F17                      | Mental and behavioural disorders due to use of tobacco                              |
|                         |              |                      |                                  | F18                      | Mental and behavioural disorders due to use of volatile solvents                    |



| Comorbidity                       | Reference(s) | ICD-9 <sup>1,2</sup> | ICD-9 Code Description                                   | ICD-10-CA <sup>1,2</sup> | ICD-10 Code Description                                                      |
|-----------------------------------|--------------|----------------------|----------------------------------------------------------|--------------------------|------------------------------------------------------------------------------|
|                                   |              |                      |                                                          | F19                      | Mental and behavioural disorders due to use of other psychoactive substances |
|                                   |              |                      |                                                          | F55                      | Abuse of non-dependence-producing substances                                 |
| Diabetes                          | 1, 14-17     | 250                  | Diabetes mellitus                                        | E10                      | Type 1 diabetes mellitus                                                     |
|                                   |              |                      |                                                          | E11                      | Type 2 diabetes mellitus                                                     |
|                                   |              |                      |                                                          | E12                      | Malnutrition-related diabetes mellitus                                       |
|                                   |              |                      |                                                          | E13                      | Other specified diabetes mellitus                                            |
|                                   |              |                      |                                                          | E14                      | Unspecified diabetes mellitus                                                |
| Hypertension                      | 18, 19       | 401                  | Essential hypertension                                   | I10                      | Essential (primary) hypertension                                             |
|                                   |              | 402                  | Hypertensive heart disease                               | I11                      | Hypertensive heart disease                                                   |
|                                   |              | 403                  | Hypertensive chronic kidney disease                      | I12                      | Hypertensive renal disease                                                   |
|                                   |              | 404                  | Hypertensive heart and chronic kidney disease            | I13                      | Hypertensive heart and renal disease                                         |
|                                   |              | 405                  | Secondary hypertension                                   | I15                      | Secondary hypertension                                                       |
| Heart and Cerebrovascular Disease | 1, 20-26     | 393                  | Chronic rheumatic pericarditis                           | G45                      | Transient cerebral ischaemic attacks and related syndromes                   |
|                                   |              | 394                  | Disease of mitral valve                                  | G46                      | Vascular syndromes of brain in cerebrovascular diseases                      |
|                                   |              | 395                  | Diseases of aortic valve                                 | I05                      | Rheumatic mitral valve diseases                                              |
|                                   |              | 396                  | Disease of mitral and aortic valves                      | I06                      | Rheumatic aortic valve diseases                                              |
|                                   |              | 397                  | Disease of other endocardial structures                  | I07                      | Rheumatic tricuspid valve diseases                                           |
|                                   |              | 398                  | Other rheumatic heart disease                            | I08                      | Multiple valve diseases                                                      |
|                                   |              | 410                  | Acute myocardial infarction                              | I09                      | Other rheumatic heart disease                                                |
|                                   |              | 411                  | Other acute and subacute forms of ischemic heart disease | I20                      | Angina pectoris                                                              |
|                                   |              | 412                  | Old myocardial infarction                                | I21                      | Acute myocardial infarction                                                  |
|                                   |              | 413                  | Angina pectoris                                          | I22                      | Subsequent myocardial infarction                                             |

| Comorbidity | Reference(s) | ICD-9 <sup>1,2</sup> | ICD-9 Code Description                          | ICD-10-CA <sup>1,2</sup> | ICD-10 Code Description                                                 |
|-------------|--------------|----------------------|-------------------------------------------------|--------------------------|-------------------------------------------------------------------------|
|             |              | 414                  | Other forms of chronic ischemic heart disease   | I23                      | Certain current complications following acute myocardial infarction     |
|             |              | 416                  | Chronic pulmonary heart disease                 | I24                      | Other acute ischaemic heart disease                                     |
|             |              | 424                  | Other disease of endocardium                    | I25                      | Chronic ischaemic heart disease                                         |
|             |              | 425                  | Cardiomyopathy                                  | I27                      | Other pulmonary heart diseases                                          |
|             |              | 426                  | Conduction disorders                            | I34                      | Nonrheumatic mitral valve disorders                                     |
|             |              | 427                  | Cardiac dysrhythmias                            | I35                      | Nonrheumatic aortic valve disorders                                     |
|             |              | 428                  | Heart failure                                   | I36                      | Nonrheumatic tricuspid valve disorders                                  |
|             |              | 430                  | Subarachnoid hemorrhage                         | I37                      | Pulmonary valve disorders                                               |
|             |              | 431                  | Intracerebral hemorrhage                        | I39                      | Endocarditis and heart valve disorders in diseases classified elsewhere |
|             |              | 432                  | Other and unspecified intracranial hemorrhage   | I42                      | Cardiomyopathy                                                          |
|             |              | 433                  | Occlusion and stenosis of precerebral arteries  | I43                      | Cardiomyopathy in diseases classified elsewhere                         |
|             |              | 434                  | Occlusion of cerebral arteries                  | I44                      | Atrioventricular and left bundle-branch block                           |
|             |              | 435                  | Transient cerebral ischemia                     | I45                      | Other conduction disorders                                              |
|             |              | 436                  | Acute, but ill-defined, cerebrovascular disease | I46                      | Cardiac arrest                                                          |
|             |              | 437                  | Other and ill-defined cerebrovascular disease   | I47                      | Paroxysmal tachycardia                                                  |
|             |              | 438                  | Late effects of cerebrovascular disease         | I48                      | Atrial fibrillation and flutter                                         |
|             |              |                      |                                                 | I49                      | Other cardiac arrhythmias                                               |
|             |              |                      |                                                 | I50                      | Heart failure                                                           |
|             |              |                      |                                                 | I60                      | Subarachnoid haemorrhage                                                |
|             |              |                      |                                                 | I61                      | Intracerebral haemorrhage                                               |
|             |              |                      |                                                 | I62                      | Other nontraumatic intracranial haemorrhage                             |
|             |              |                      |                                                 | I63                      | Cerebral infarction                                                     |
|             |              |                      |                                                 | I64                      | Stroke, not specified as haemorrhage or infarction                      |

| Comorbidity                   | Reference(s) | ICD-9 <sup>1,2</sup> | ICD-9 Code Description                               | ICD-10-CA <sup>1,2</sup>                      | ICD-10 Code Description                                                              |
|-------------------------------|--------------|----------------------|------------------------------------------------------|-----------------------------------------------|--------------------------------------------------------------------------------------|
|                               |              |                      |                                                      | I65                                           | Occlusion and stenosis of precerebral arteries, not resulting in cerebral infarction |
|                               |              |                      |                                                      | I66                                           | Occlusion and stenosis of cerebral arteries, not resulting in cerebral infarction    |
|                               |              |                      |                                                      | I67                                           | Other cerebrovascular diseases                                                       |
|                               |              |                      |                                                      | I68                                           | Cerebrovascular disorders in diseases classified elsewhere                           |
|                               |              |                      |                                                      | I69                                           | Sequelae of cerebrovascular disease                                                  |
| Chronic Respiratory Disorders | 1, 17, 27-29 | 491                  | Chronic bronchitis                                   | J41                                           | Simple and mucopurulent chronic bronchitis                                           |
|                               |              | 492                  | Emphysema                                            | J42                                           | Unspecified chronic bronchitis                                                       |
|                               |              | 493                  | Asthma                                               | J43                                           | Emphysema                                                                            |
|                               |              | 496                  | Chronic airway obstruction, not elsewhere classified | J44                                           | Other chronic obstructive pulmonary disease                                          |
|                               |              | 518.8                | Other diseases of lung                               | J45                                           | Asthma                                                                               |
|                               |              |                      |                                                      |                                               | J46                                                                                  |
|                               |              |                      | J96                                                  | Respiratory failure, not elsewhere classified |                                                                                      |
| Thyroid Disorders             | 30           | 242                  | Thyrotoxicosis with or without goiter                | E02                                           | Subclinical iodine-deficiency hypothyroidism                                         |
|                               |              | 244                  | Acquired hypothyroidism                              | E03                                           | Other hypothyroidism                                                                 |
|                               |              | 245                  | Thyroiditis                                          | E05                                           | Thyrotoxicosis (hyperthyroidism)                                                     |
|                               |              |                      |                                                      | E06                                           | Thyroiditis                                                                          |
| Chronic Kidney Disease        | 31           | 403                  | Hypertensive chronic kidney disease                  | I12                                           | Hypertensive renal disease                                                           |
|                               |              | 404                  | Hypertensive heart and chronic kidney disease        | I13                                           | Hypertensive heart and renal disease                                                 |
|                               |              | 581                  | Nephrotic syndrome                                   | N03                                           | Chronic nephritic syndrome                                                           |
|                               |              | 582                  | Chronic glomerulonephritis                           | N05                                           | Unspecified nephritic syndrome                                                       |

| Comorbidity                      | Reference(s) | ICD-9 <sup>1,2</sup> | ICD-9 Code Description                                       | ICD-10-CA <sup>1,2</sup> | ICD-10 Code Description                                  |
|----------------------------------|--------------|----------------------|--------------------------------------------------------------|--------------------------|----------------------------------------------------------|
|                                  |              | 583                  | Nephritis and nephropathy, not specified as acute or chronic | N08                      | Glomerular disorders in diseases classified elsewhere    |
|                                  |              | 585                  | Chronic kidney disease (CKD)                                 | N18                      | Chronic kidney disease                                   |
|                                  |              | 586                  | Renal failure, unspecified                                   | N19                      | Unspecified kidney failure                               |
|                                  |              | 587                  | Renal sclerosis, unspecified                                 | N26                      | Unspecified contracted kidney                            |
|                                  |              | 588                  | Disorders resulting from impaired renal function             | N25                      | Disorders resulting from impaired renal tubular function |
| Chronic Liver Disease            | 32-35        | 070                  | Viral hepatitis                                              | B18                      | Chronic viral hepatitis                                  |
|                                  |              | 571                  | Chronic liver disease and cirrhosis                          | K70                      | Alcoholic liver disease                                  |
|                                  |              | 572                  | Liver abscess and sequelae of chronic liver disease          | K71                      | Toxic liver disease                                      |
|                                  |              | 573                  | Other disorders of liver                                     | K72                      | Hepatic failure, not elsewhere classified                |
|                                  |              |                      |                                                              | K73                      | Chronic hepatitis, not elsewhere classified              |
|                                  |              |                      |                                                              | K74                      | Fibrosis and cirrhosis of liver                          |
|                                  |              |                      |                                                              | K75                      | Other inflammatory liver diseases                        |
|                                  |              |                      |                                                              | K76                      | Other diseases of liver                                  |
|                                  |              |                      |                                                              | K77                      | Liver disorders in diseases classified elsewhere         |
| Upper Gastrointestinal Disorders | 36-40        | 530                  | Diseases of esophagus                                        | K20                      | Oesphagitis                                              |
|                                  |              | 531                  | Gastric ulcer                                                | K21                      | Gastro-oesophageal reflux disease                        |
|                                  |              | 532                  | Duodenal ulcer                                               | K22                      | Other diseases of oesophagus                             |
|                                  |              | 533                  | Peptic ulcer, site unspecified                               | K25                      | Gastric ulcer                                            |
|                                  |              | 534                  | Gastrojejunal ulcer                                          | K26                      | Duodenal ulcer                                           |
|                                  |              | 535                  | Gastritis and duodenitis                                     | K27                      | Peptic ulcer, site unspecified                           |
|                                  |              | 578                  | Gastrointestinal hemorrhage                                  | K28                      | Gastrojejunal ulcer                                      |
|                                  |              |                      |                                                              | K29                      | Gastritis and duodenitis                                 |
|                                  |              |                      |                                                              | K92                      | Other diseases of digestive system                       |
| Inflammatory Bowel Disorders     | 41, 42       | 555                  | Regional enteritis                                           | K50                      | Crohn disease (regional enteritis)                       |
|                                  |              | 556                  | Ulcerative colitis                                           | K51                      | Ulcerative colitis                                       |

| Comorbidity            | Reference(s)                                       | ICD-9 <sup>1,2</sup> | ICD-9 Code Description                                               | ICD-10-CA <sup>1,2</sup> | ICD-10 Code Description                                                                    |
|------------------------|----------------------------------------------------|----------------------|----------------------------------------------------------------------|--------------------------|--------------------------------------------------------------------------------------------|
| Traumatic Brain Injury | 43-45                                              | 310.2                | Postconcussional syndrome                                            | F07.2                    | Postconcussional syndrome                                                                  |
|                        |                                                    | 800                  | Fracture of vault of skull                                           | S02                      | Fracture of skull and facial bones                                                         |
|                        |                                                    | 801                  | Fracture of base of skull                                            | S06                      | Intracranial injury                                                                        |
|                        |                                                    | 802                  | Fracture of face bones                                               | S07                      | Crushing injury of head                                                                    |
|                        |                                                    | 803                  | Other and unqualified skull fractures                                | T02.0                    | Fracture involving head with neck                                                          |
|                        |                                                    | 804                  | Multiple fractures involving skull or face with other bones          | T04.0                    | Crushing injury involving head with neck                                                   |
|                        |                                                    | 850                  | Concussion                                                           | T06.0                    | Injuries of brain and cranial nerves with injuries of nerves and spinal cord at neck level |
|                        |                                                    | 851                  | Cerebral laceration and contusion                                    | T90                      | Sequelae of injuries of head                                                               |
|                        |                                                    | 852                  | Subarachnoid, subdural, and extradural haemorrhage, following injury |                          |                                                                                            |
|                        |                                                    | 853                  | Other and unspecified intracranial haemorrhage following injury      |                          |                                                                                            |
|                        |                                                    | 854                  | Intracranial injury of other and unspecified nature                  |                          |                                                                                            |
|                        |                                                    | 905.0                | Late effect of fracture of skull and face bones                      |                          |                                                                                            |
|                        |                                                    | 907.0                | Late effect of intracranial injury without mention of skull fracture |                          |                                                                                            |
|                        |                                                    | 907.1                | Late effect of injury to cranial nerve                               |                          |                                                                                            |
|                        |                                                    | 925.1                | Crushing injury of face and scalp                                    |                          |                                                                                            |
| 959.0                  | Injury, other and unspecified, head, face and neck |                      |                                                                      |                          |                                                                                            |
| Seizure Disorders      | 46-48                                              | 345                  | Epilepsy and recurrent seizures                                      | G40                      | Epilepsy                                                                                   |
|                        |                                                    | 780.3                | Convulsions                                                          | G41                      | Status epilepticus                                                                         |
|                        |                                                    |                      |                                                                      | R56.8                    | Other and unspecified convulsions                                                          |

| Comorbidity              | Reference(s) | ICD-9 <sup>1,2</sup> | ICD-9 Code Description                                         | ICD-10-CA <sup>1,2</sup> | ICD-10 Code Description                                   |
|--------------------------|--------------|----------------------|----------------------------------------------------------------|--------------------------|-----------------------------------------------------------|
| Sleep Apnea and Insomnia | 49-51        | 307.4                | Specific disorders of sleep of nonorganic origin               | G47.0                    | Disorders of initiating and maintaining sleep [insomnias] |
|                          |              | 327.0                | Organic disorders of initiating and maintaining sleep [organic | G47.3                    | Sleep apnoea                                              |
|                          |              | 327.2                | insomnia]                                                      |                          |                                                           |
|                          |              | 780.5                | Organic sleep apnea                                            | F51.0                    | Nonorganic insomnia                                       |
|                          |              | 786.0                | Sleep disturbances                                             | R06.8                    | Other and unspecified abnormalities of breathing          |
|                          |              |                      | Dyspnea and respiratory abnormalities                          |                          |                                                           |

<sup>1</sup>Codes are used to identify comorbid health conditions in the Medical Services Plan (MSP) and Discharge Abstract Database (DAD). ICD-9 codes in MSP data are only considered valid to 3 digits. To maintain consistency with the codes used in the MSP file, only 3-digit ICD-10-CA codes are also used. In some cases, four digits are used if the three digit term is overly broad and likely to result in severe misclassification.

<sup>2</sup>Both ICD-9 and ICD-10-CA codes are available in the DAD. Corresponding ICD-10-CA codes have been mapped to the appropriate ICD-9 codes. CIHI provided backward conversions for ICD-10-CA to ICD-9 codes from 2001/2002 to 2007/2008 and these conversions were used to help guide the mapping.

**Abbreviations:** ICD-9=International Classification of Diseases, 9<sup>th</sup> Revision; ICD-10-CA=International Classification of Diseases, 10<sup>th</sup> Revision, Canada

## Comorbidity References

1. Lix LM, Yogendran MS, Shaw SY, Burchill C, Metge C, Bond R. Population-based data sources for chronic disease surveillance. *Chronic Dis Can.* 2008;29(1):31-8.
2. Noonan VK, Thorogood NP, Fingas M, Batke J, Belanger L, Kwon BK, et al. The validity of administrative data to classify patients with spinal column and cord injuries. *J Neurotrauma.* 2013;30(3):173-80.
3. Lacasse A, Ware MA, Dorais M, Lanctot H, Choiniere M. Is the Quebec provincial administrative database a valid source for research on chronic non-cancer pain? *Pharmacoepidemiol Drug Saf.* 2015;24(9):980-90.
4. Sinnott PL, Siroka AM, Shane AC, Trafton JA, Wagner TH. Identifying neck and back pain in administrative data: defining the right cohort. *Spine (Phila Pa 1976).* 2012;37(10):860-74.
5. Kolodner K, Lipton RB, Lafata JE, Leotta C, Liberman JN, Chee E, et al. Pharmacy and medical claims data identified migraine sufferers with high specificity but modest sensitivity. *J Clin Epidemiol.* 2004;57(9):962-72.
6. Carlson KF, Taylor BC, Hagel EM, Cutting A, Kerns R, Sayer NA. Headache diagnoses among Iraq and Afghanistan war veterans enrolled in VA: a gender comparison. *Headache.* 2013;53(10):1573-82.
7. Canadian Institute for Health Information. *Hospital Mental Health Services in Canada, 2005-2006.* Ottawa, ON: CIHI; 2008.
8. Frayne SM, Miller DR, Sharkansky EJ, Jackson VW, Wang F, Halanych JH, et al. Using administrative data to identify mental illness: what approach is best? *Am J Med Qual.* 2010;25(1):42-50.
9. Kisely S, Lin E, Gilbert C, Smith M, Campbell LA, Vasiliadis HM. Use of administrative data for the surveillance of mood and anxiety disorders. *Aust N Z J Psychiatry.* 2009;43(12):1118-25.
10. Fransoo R, Martens P, Team TNTK, Prior H, Burchill C, Koseva I, et al. *The 2013 RHA Indicators Atlas.* Winnipeg, MB: Manitoba Centre for Health Policy; 2013.
11. Schneeweiss S, Patrick AR, Solomon DH, Mehta J, Dormuth C, Miller M, et al. Variation in the risk of suicide attempts and completed suicides by antidepressant agent in adults: a propensity score-adjusted analysis of 9 years' data. *Arch Gen Psychiatry.* 2010;67(5):497-506.
12. Iribarren C, Sidney S, Jacobs DR, Jr., Weisner C. Hospitalization for suicide attempt and completed suicide: epidemiological features in a managed care population. *Soc Psychiatry Psychiatr Epidemiol.* 2000;35(7):288-96.
13. Kim HM, Smith EG, Stano CM, Ganoczy D, Zivin K, Walters H, et al. Validation of key behaviourally based mental health diagnoses in administrative data: suicide attempt, alcohol abuse, illicit drug abuse and tobacco use. *BMC Health Serv Res.* 2012;12:18.
14. Southern DA, Roberts B, Edwards A, Dean S, Norton P, Svenson LW, et al. Validity of administrative data claim-based methods for identifying individuals with diabetes at a population level. *Can J Public Health.* 2010;101(1):61-4.
15. Hux JE, Ivis F, Flintoft V, Bica A. Diabetes in Ontario: determination of prevalence and incidence using a validated administrative data algorithm. *Diabetes Care.* 2002;25(3):512-6.
16. Chen G, Khan N, Walker R, Quan H. Validating ICD coding algorithms for diabetes mellitus from administrative data. *Diabetes Res Clin Pract.* 2010;89(2):189-95.
17. Borzecki AM, Wong AT, Hickey EC, Ash AS, Berlowitz DR. Identifying hypertension-related comorbidities from administrative data: what's the optimal approach? *Am J Med Qual.* 2004;19(5):201-6.

18. Tu K, Campbell NR, Chen ZL, Cauch-Dudek KJ, McAlister FA. Accuracy of administrative databases in identifying patients with hypertension. *Open Med.* 2007;1(1):e18-26.
19. Quan H, Khan N, Hemmelgarn BR, Tu K, Chen G, Campbell N, et al. Validation of a case definition to define hypertension using administrative data. *Hypertension.* 2009;54(6):1423-8.
20. Tamariz L, Harkins T, Nair V. A systematic review of validated methods for identifying ventricular arrhythmias using administrative and claims data. *Pharmacoepidemiol Drug Saf.* 2012;21 Suppl 1:148-53.
21. Schultz SE, Rothwell DM, Chen Z, Tu K. Identifying cases of congestive heart failure from administrative data: a validation study using primary care patient records. *Chronic Dis Inj Can.* 2013;33(3):160-6.
22. Joshy G, Korda RJ, Abhayaratna WP, Soga K, Banks E. Categorising major cardiovascular disease hospitalisations from routinely collected data. *Public Health Res Pract.* 2015;25(3):e2531532.
23. Tu K, Wang M, Young J, Green D, Ivers NM, Butt D, et al. Validity of administrative data for identifying patients who have had a stroke or transient ischemic attack using EMRALD as a reference standard. *Can J Cardiol.* 2013;29(11):1388-94.
24. Quan H, Sundararajan V, Halfon P, Fong A, Burnand B, Luthi JC, et al. Coding algorithms for defining comorbidities in ICD-9-CM and ICD-10 administrative data. *Med Care.* 2005;43(11):1130-9.
25. McCormick N, Bhole V, Lacaille D, Avina-Zubieta JA. Validity of Diagnostic Codes for Acute Stroke in Administrative Databases: A Systematic Review. *PLoS One.* 2015;10(8):e0135834.
26. Tu K, Mitiku T, Lee DS, Guo H, Tu JV. Validation of physician billing and hospitalization data to identify patients with ischemic heart disease using data from the Electronic Medical Record Administrative data Linked Database (EMRALD). *Can J Cardiol.* 2010;26(7):e225-8.
27. Lacasse Y, Montori VM, Lanthier C, Maltis F. The validity of diagnosing chronic obstructive pulmonary disease from a large administrative database. *Can Respir J.* 2005;12(5):251-6.
28. Gershon AS, Wang C, Guan J, Vasilevska-Ristovska J, Cicutto L, To T. Identifying patients with physician-diagnosed asthma in health administrative databases. *Can Respir J.* 2009;16(6):183-8.
29. Gershon AS, Wang C, Guan J, Vasilevska-Ristovska J, Cicutto L, To T. Identifying individuals with physician diagnosed COPD in health administrative databases. *COPD.* 2009;6(5):388-94.
30. Marrie RA, Yu BN, Leung S, Elliott L, Warren S, Wolfson C, et al. The incidence and prevalence of thyroid disease do not differ in the multiple sclerosis and general populations: a validation study using administrative data. *Neuroepidemiology.* 2012;39(2):135-42.
31. Vlasschaert ME, Bejaimal SA, Hackam DG, Quinn R, Cuerden MS, Oliver MJ, et al. Validity of administrative database coding for kidney disease: a systematic review. *Am J Kidney Dis.* 2011;57(1):29-43.
32. Desai S, Peltekian KM. Canadian mortality rates for liver disease: taking a closer look at ICD coding. *Can J Public Health.* 2004;95(3):198-200.
33. Goldberg D, Lewis J, Halpern S, Weiner M, Lo Re V, 3rd. Validation of three coding algorithms to identify patients with end-stage liver disease in an administrative database. *Pharmacoepidemiol Drug Saf.* 2012;21(7):765-9.
34. Niu B, Forde KA, Goldberg DS. Coding algorithms for identifying patients with cirrhosis and hepatitis B or C virus using administrative data. *Pharmacoepidemiol Drug Saf.* 2015;24(1):107-11.



35. Kramer JR, Davila JA, Miller ED, Richardson P, Giordano TP, El-Serag HB. The validity of viral hepatitis and chronic liver disease diagnoses in Veterans Affairs administrative databases. *Aliment Pharmacol Ther.* 2008;27(3):274-82.
36. Lopushinsky SR, Covarrubia KA, Rabeneck L, Austin PC, Urbach DR. Accuracy of administrative health data for the diagnosis of upper gastrointestinal diseases. *Surg Endosc.* 2007;21(10):1733-7.
37. Curtis JR, Chen SY, Werther W, John A, Johnson DA. Validation of ICD-9-CM codes to identify gastrointestinal perforation events in administrative claims data among hospitalized rheumatoid arthritis patients. *Pharmacoepidemiol Drug Saf.* 2011;20(11):1150-8.
38. Pisa F, Castellsague J, Drigo D, Riera-Guardia N, Giangreco M, Rosolen V, et al. Accuracy of International Classification of Diseases, 9th Revision, Clinical Modification codes for upper gastrointestinal complications varied by position and age: a validation study in a cohort of nonsteroidal anti-inflammatory drugs users in Friuli Venezia Giulia, Italy. *Pharmacoepidemiol Drug Saf.* 2013;22(11):1195-204.
39. Raiford DS, Perez Gutthann S, Garcia Rodriguez LA. Positive predictive value of ICD-9 codes in the identification of cases of complicated peptic ulcer disease in the Saskatchewan hospital automated database. *Epidemiology.* 1996;7(1):101-4.
40. Castellsague J, Holick CN, Hoffman CC, Gimeno V, Stang MR, Perez-Gutthann S. Risk of upper gastrointestinal complications associated with cyclooxygenase-2 selective and nonselective nonsteroidal antiinflammatory drugs. *Pharmacotherapy.* 2009;29(12):1397-407.
41. Benchimol EI, Guttmann A, Mack DR, Nguyen GC, Marshall JK, Gregor JC, et al. Validation of international algorithms to identify adults with inflammatory bowel disease in health administrative data from Ontario, Canada. *J Clin Epidemiol.* 2014;67(8):887-96.
42. Rezaie A, Quan H, Fedorak RN, Panaccione R, Hilsden RJ. Development and validation of an administrative case definition for inflammatory bowel diseases. *Can J Gastroenterol.* 2012;26(10):711-7.
43. Ng R, Maxwell CJ, Yates EA, Nysten K, Antflick J, Jetté N, et al. Brain Disorders in Ontario: Prevalence, Incidence and Costs from Health Administrative Data. Toronto, ON: Institute for Clinical Evaluative Sciences; 2015.
44. Carroll CP, Cochran JA, Guse CE, Wang MC. Are we underestimating the burden of traumatic brain injury? Surveillance of severe traumatic brain injury using centers for disease control International classification of disease, ninth revision, clinical modification, traumatic brain injury codes. *Neurosurgery.* 2012;71(6):1064-70; discussion 70.
45. Bazarian JJ, Veazie P, Mookerjee S, Lerner EB. Accuracy of mild traumatic brain injury case ascertainment using ICD-9 codes. *Acad Emerg Med.* 2006;13(1):31-8.
46. Tu K, Wang M, Jaakkimainen RL, Butt D, Ivers NM, Young J, et al. Assessing the validity of using administrative data to identify patients with epilepsy. *Epilepsia.* 2014;55(2):335-43.
47. Reid AY, St Germaine-Smith C, Liu M, Sadiq S, Quan H, Wiebe S, et al. Development and validation of a case definition for epilepsy for use with administrative health data. *Epilepsy Res.* 2012;102(3):173-9.
48. Jette N, Reid AY, Quan H, Hill MD, Wiebe S. How accurate is ICD coding for epilepsy? *Epilepsia.* 2010;51(1):62-9.
49. Hermes E, Rosenheck R. Prevalence, pharmacotherapy and clinical correlates of diagnosed insomnia among Veterans Health Administration service users nationally. *Sleep Med.* 2014;15(5):508-14.
50. Anderson LH, Whitebird RR, Schultz J, McEvoy CE, Kreitzer MJ, Gross CR. Healthcare utilization and costs in persons with insomnia in a managed care population. *Am J Manag Care.* 2014;20(5):e157-65.

51. Mclsaac DI, Gershon A, Wijeysondera D, Bryson GL, Badner N, van Walraven C. Identifying Obstructive Sleep Apnea in Administrative Data: A Study of Diagnostic Accuracy. *Anesthesiology*. 2015;123(2):253-63.

**Supplementary Table 4.** CCI and CCP codes used to identify spinal x-rays and spinal surgeries in the DAD file and fee item codes used to identify spinal x-rays in the MSP file

| CCP Code <sup>1</sup> | Description                                                          | CCI Code <sup>1</sup>                              | Description                                                                     | Fee Item     | Description                                             |
|-----------------------|----------------------------------------------------------------------|----------------------------------------------------|---------------------------------------------------------------------------------|--------------|---------------------------------------------------------|
| <b>02.11</b>          | X-ray of cervical spine                                              | <b>3.AW.10</b>                                     | Xray, spinal cord                                                               | <b>8540</b>  | X-ray – cervical spine                                  |
| <b>02.12</b>          | X-ray of thoracic spine                                              | <b>3.SC.10</b>                                     | Xray, spinal vertebrae                                                          | <b>8541</b>  | X-ray – thoracic spine                                  |
| <b>02.13</b>          | X-ray of lumbosacral spine                                           | <b>3.SE.10</b>                                     | Xray, intervertebral disc                                                       | <b>8542</b>  | X-ray – lumbar spine                                    |
| <b>02.19</b>          |                                                                      | <b>3.SF.10</b>                                     | Xray, sacrum and coccyx                                                         | <b>8543</b>  | X-ray – sacrum and coccyx                               |
| <b>16.83</b>          | Other x-ray of spine                                                 |                                                    |                                                                                 | <b>8545</b>  | X-ray – sacro-iliac joints                              |
|                       | Contrast myelogram                                                   |                                                    |                                                                                 | <b>8546</b>  | Scoliosis film                                          |
|                       |                                                                      |                                                    |                                                                                 | <b>8548</b>  | Myelogram and/or posterior fossa positive contrast      |
|                       |                                                                      |                                                    |                                                                                 | <b>8549</b>  | X-ray – spine additional views (e.g., flexion, bending) |
|                       |                                                                      |                                                    |                                                                                 | <b>19138</b> | WCB chiro spinal series                                 |
|                       |                                                                      |                                                    |                                                                                 | <b>19139</b> | WCB chiro spinal series recheck                         |
| <b>16.02</b>          | Reopening of laminectomy site                                        |                                                    |                                                                                 |              |                                                         |
| <b>16.09</b>          | Other exploration and decompression of spinal canal                  | <b>1.SA.80</b><br><b>1.SC.80</b><br><b>1.SF.80</b> | Repair, atlas and axis<br>Repair, spinal vertebrae<br>Repair, sacrum and coccyx |              |                                                         |
| <b>16.1</b>           | Division of intraspinal nerve root                                   | <b>1.AW.59</b>                                     | Destruction, spinal cord                                                        |              |                                                         |
| <b>16.2</b>           | Chordotomy                                                           |                                                    |                                                                                 |              |                                                         |
| <b>16.3</b>           | Excision or destruction of lesion of spinal cord and spinal meninges | <b>1.AW.87</b><br><b>1.AX.87</b>                   | Excision partial, spinal cord<br>Excision partial, spinal canal and meninges    |              |                                                         |

| CCP Code <sup>1</sup>       | Description                                                                                                                       | CCI Code <sup>1</sup>                                                | Description                                                                                                                                                             | Fee Item | Description |
|-----------------------------|-----------------------------------------------------------------------------------------------------------------------------------|----------------------------------------------------------------------|-------------------------------------------------------------------------------------------------------------------------------------------------------------------------|----------|-------------|
| <b>16.43</b><br><b>16.5</b> | Repair of vertebral fracture<br>Freeing of adhesions of spinal cord and nerve roots                                               | <b>1.AW.72</b><br><b>1.SF.73</b>                                     | Release, spinal cord<br>Reduction, sacrum and coccyx                                                                                                                    |          |             |
| <b>89.78</b>                | Other partial ostectomy, other specified site (pelvic bones, phalanges of foot or hand, vertebrae)                                | <b>1.SC.87</b><br><b>1.SF.87</b>                                     | Excision partial, spinal vertebrae<br>Excision partial, sacrum and coccyx                                                                                               |          |             |
| <b>89.88</b>                | Total ostectomy, other specified site (pelvic bones, phalanges of foot or hand, vertebrae)                                        | <b>1.SA.89</b><br><b>1.SC.89</b><br><b>1.SF.89</b><br><b>1.SF.91</b> | Excision total, atlas and axis<br>Excision total, spinal vertebrae<br>Excision total, sacrum and coccyx<br>Excision radical, sacrum and coccyx                          |          |             |
| <b>90.58</b>                | Internal fixation of bone (without fracture reduction), other specified site (pelvic bones, phalanges of foot or hand, vertebrae) | <b>1.SA.74</b><br><b>1.SC.74</b><br><b>1.SE.53</b><br><b>1.SF.74</b> | Fixation, atlas and axis<br>Fixation, spinal vertebrae<br>Implantation of internal device, intervertebral disc<br>Fixation, sacrum and coccyx                           |          |             |
| <b>90.68</b>                | Removal of internal fixation device, other specified site (pelvic bones, phalanges of foot or hand, vertebrae)                    | <b>1.SA.55</b><br><b>1.SC.55</b><br><b>1.SE.55</b><br><b>1.SF.55</b> | Removal of device, atlas and axis<br>Removal of device or appliance, spinal vertebrae<br>Removal of device, intervertebral disc<br>Removal of device, sacrum and coccyx |          |             |

| CCP Code <sup>1</sup> | Description                                      | CCI Code <sup>1</sup>                              | Description                                                                                                      | Fee Item | Description |
|-----------------------|--------------------------------------------------|----------------------------------------------------|------------------------------------------------------------------------------------------------------------------|----------|-------------|
| <b>92.31</b>          | Excision (or destruction) of intervertebral disc | <b>1.SE.59</b><br><b>1.SE.87</b><br><b>1.SE.89</b> | Destruction, intervertebral disc<br>Excision partial, intervertebral disc<br>Excision total, intervertebral disc |          |             |
| <b>93.01</b>          | Atlas-axis spinal fusion                         | <b>1.SA.75</b>                                     | Fusion, atlas and axis                                                                                           |          |             |
| <b>93.02</b>          | Other cervical spinal fusion                     | <b>1.SC.75</b>                                     | Fusion, spinal vertebrae                                                                                         |          |             |
| <b>93.03</b>          | Dorsal spinal fusion                             | <b>1.SF.75</b>                                     | Fusion, sacrum and coccyx                                                                                        |          |             |
| <b>93.04</b>          | Dorsolumbar spinal fusion with Harrington rod    |                                                    |                                                                                                                  |          |             |
| <b>93.05</b>          | Other dorsolumbar spinal fusion                  |                                                    |                                                                                                                  |          |             |
| <b>93.06</b>          | Lumbar spinal fusion                             |                                                    |                                                                                                                  |          |             |
| <b>93.07</b>          | Lumbosacral spinal fusion                        |                                                    |                                                                                                                  |          |             |
| <b>93.08</b>          | Refusion of spine                                |                                                    |                                                                                                                  |          |             |
| <b>93.09</b>          | Other spinal fusion, unspecified site            |                                                    |                                                                                                                  |          |             |

<sup>1</sup>Both CCI and CCP codes are available in the DAD. Corresponding CCI codes have been mapped to the appropriate CCP codes. CIHI provided backward conversions for CCI to CCP codes from 2001/2002 to 2007/2008 and these conversions were used to help guide the mapping.

**Abbreviations:** CCI=Canadian Classification of Health Interventions; CCP=Canadian Classification of Diagnostic, Therapeutic, and Surgical Procedures; CIHI=Canadian Institute for Health Information; DAD=Discharge Abstract Database; MSP=Medical Services Plan

**Supplementary Table 5.** Additional baseline characteristics of the cohort of workers' compensation claimants with short-term disability claims for injuries to the low back from 1998-2009 and with at least one prescription opioid, NSAID, or SMR dispense in the first eight weeks after injury (n=55,571)

| Variable                                                                            | n ( % )       |
|-------------------------------------------------------------------------------------|---------------|
| <b>Comorbidities in the two years before injury</b>                                 |               |
| Back and/or neck pain                                                               | 18,303 (32.9) |
| Arthritis/rheumatism and other joint pain                                           | 10,554 (19.0) |
| Neuropathic pain                                                                    | 770 ( 1.4)    |
| Headache disorders                                                                  | 4,898 ( 8.8)  |
| Mood and anxiety disorders                                                          | 9,490 (17.1)  |
| Suicide attempt/self-harm history                                                   | 114 ( 0.2)    |
| Substance use disorder                                                              | 838 ( 1.5)    |
| Diabetes                                                                            | 1,998 ( 3.6)  |
| Hypertension                                                                        | 3,718 ( 6.7)  |
| Heart and cerebrovascular disease                                                   | 1,437 ( 2.6)  |
| Chronic respiratory disorders                                                       | 1,840 ( 3.3)  |
| Chronic liver disease                                                               | 443 ( 0.8)    |
| Chronic kidney disease                                                              | 93 ( 0.2)     |
| Thyroid disease                                                                     | 1,282 ( 1.3)  |
| Upper gastrointestinal disorders                                                    | 1,995 ( 3.6)  |
| Inflammatory bowel disease                                                          | 395 ( 0.4)    |
| Insomnia and sleep apnea                                                            | 331 ( 0.6)    |
| Seizure disorders                                                                   | 179 ( 0.3)    |
| Traumatic brain injury                                                              | 312 ( 0.6)    |
| <b>Number of hospitalizations in the year before injury</b>                         |               |
| 0                                                                                   | 51,046 (91.9) |
| 1                                                                                   | 3,863 ( 7.0)  |
| ≥2                                                                                  | 662 ( 1.2)    |
| <b>Hospitalization in the first eight weeks after injury</b>                        |               |
| No                                                                                  | 54,392 (97.9) |
| Yes                                                                                 | 1,179 ( 2.1)  |
| <b>Number of general practitioner visits in the year before injury</b>              |               |
| 0                                                                                   | 5,963 (10.7)  |
| 1-2                                                                                 | 12,396 (22.3) |
| 3-4                                                                                 | 10,541 (19.0) |
| 5-7                                                                                 | 11,195 (20.2) |
| ≥8                                                                                  | 15,476 (27.9) |
| <b>Number of pain-related physician specialist visits in the year before injury</b> |               |
| 0                                                                                   | 45,636 (82.2) |
| 1                                                                                   | 5,505 ( 9.9)  |
| 2                                                                                   | 2,188 ( 3.9)  |
| ≥3                                                                                  | 2,242 ( 4.0)  |

| Variable                                                                             | n ( % )       |
|--------------------------------------------------------------------------------------|---------------|
| <b>Number of other physician specialist visits in the year before injury</b>         |               |
| 0                                                                                    | 42,778 (77.0) |
| 1                                                                                    | 6,960 ( 12.5) |
| 2                                                                                    | 2,769 ( 5.0)  |
| ≥3                                                                                   | 3,064 ( 5.5)  |
| <b>Pain-related physician specialist visit in the first eight weeks after injury</b> |               |
| No                                                                                   | 50,554 (91.0) |
| Yes                                                                                  | 5,017 ( 9.0)  |
| <b>Spine surgery in the two years before injury</b>                                  |               |
| No                                                                                   | 55,423 (99.7) |
| Yes                                                                                  | 148 ( 0.3)    |
| <b>Spine surgery in the first eight weeks after injury</b>                           |               |
| No                                                                                   | 55,490 (99.9) |
| Yes                                                                                  | 81 ( 0.2)     |
| <b>At least one spine x-ray in the year before injury</b>                            |               |
| No                                                                                   | 51,257 (92.2) |
| Yes                                                                                  | 4,314 ( 7.8)  |
| <b>At least one spine x-ray in the first eight weeks after injury</b>                |               |
| No                                                                                   | 41,239 (74.2) |
| Yes                                                                                  | 14,332 (25.8) |
| <b>At least one antidepressant dispense in the year before injury</b>                |               |
| No                                                                                   | 52,269 (94.1) |
| Yes                                                                                  | 3,302 ( 5.9)  |
| <b>At least one antidepressant dispense in the eight weeks after injury</b>          |               |
| No                                                                                   | 53,575 (96.4) |
| Yes                                                                                  | 1,996 ( 3.6)  |
| <b>At least one anticonvulsant dispense in the year before injury</b>                |               |
| No                                                                                   | 53,820 (96.9) |
| Yes                                                                                  | 1,751 ( 3.2)  |
| <b>At least one anticonvulsant dispense in the eight weeks after injury</b>          |               |
| No                                                                                   | 54,234 (97.6) |
| Yes                                                                                  | 1,337 ( 2.4)  |

| Variable                                                                                  | n ( % )       |
|-------------------------------------------------------------------------------------------|---------------|
| <b>At least one sedative hypnotic/anxiolytic dispense in the year before injury</b>       |               |
| No                                                                                        | 49,817 (89.7) |
| Yes                                                                                       | 5,754 (10.4)  |
| <b>At least one sedative hypnotic/anxiolytic dispense in the eight weeks after injury</b> |               |
| No                                                                                        | 51,266 (92.3) |
| Yes                                                                                       | 4,305 ( 7.8)  |
